# Supplementary material for: Increase in preterm stillbirths and reduction in iatrogenic preterm births for fetal compromise: a multi-centre cohort study of COVID-19 lockdown effects in Melbourne, Australia
Source: bioRxiv or medRxiv preprint supplement (doi:10.1101/2021.10.04.21264500), 2021-10-05

A.

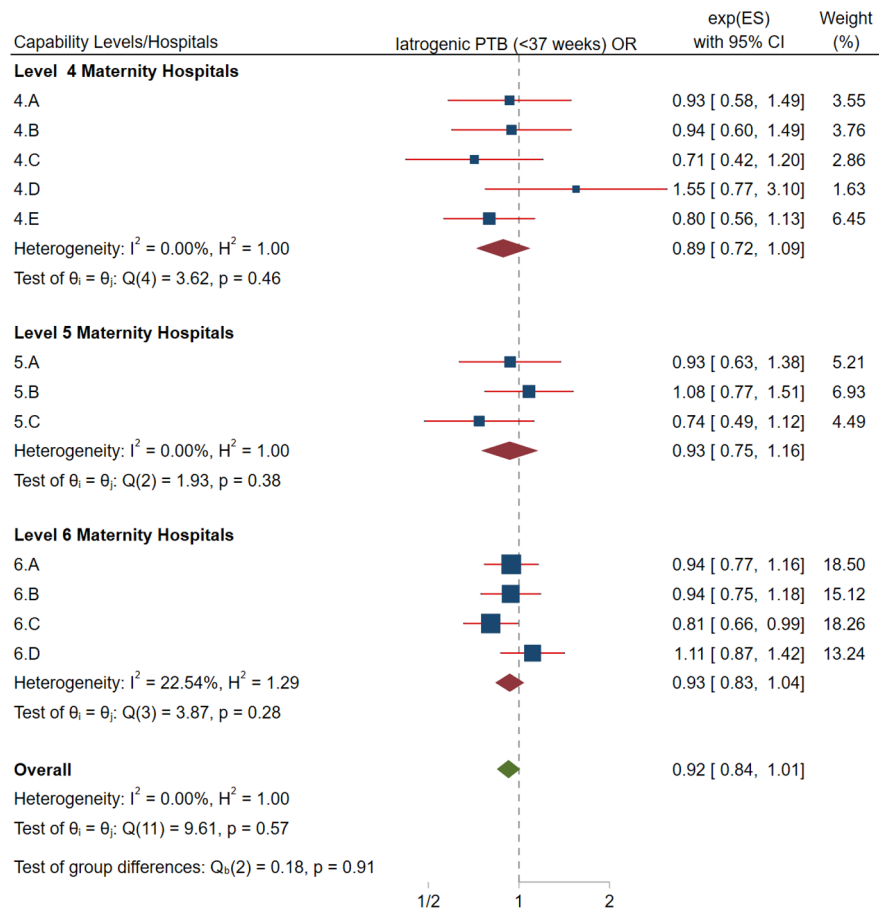

B.

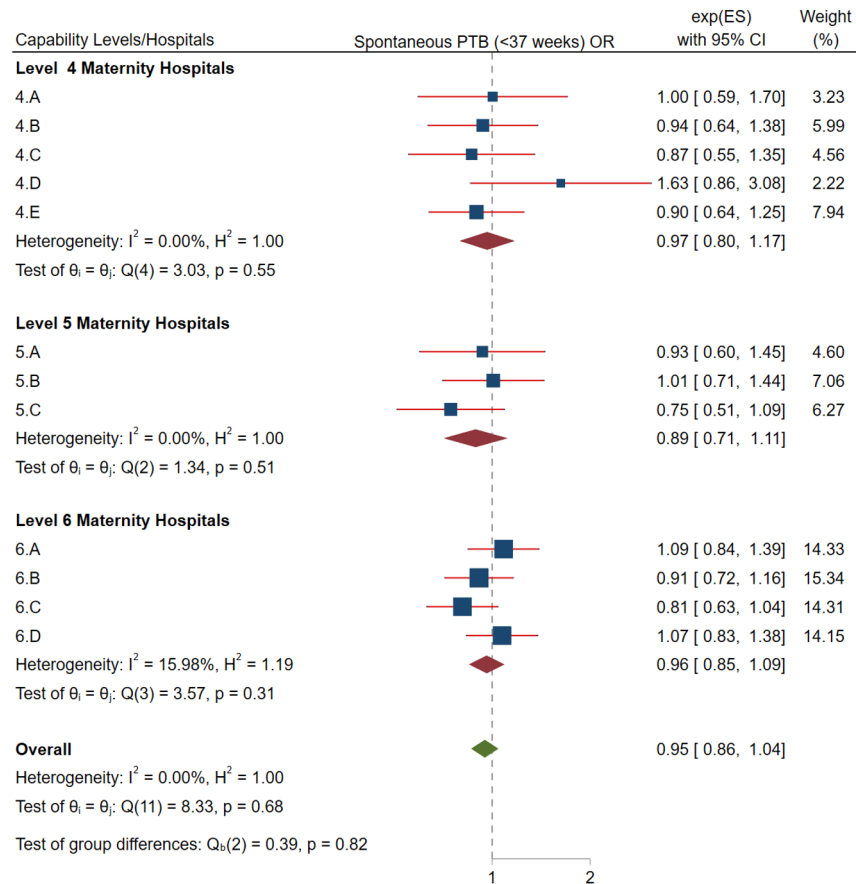

Supplement: Supplementary file [file media-1.pdf]
